# Supplementary material for: Evaluation of a Selective Chemical Probe Validates That CK2 Mediates Neuroinflammation in a Human Induced Pluripotent Stem Cell-Derived Microglial Model
Source: PubMed Central journal article supplement (PMC9239073; doi:10.3389/fnmol.2022.824956), 2022-06-14
Supplement: Table_1.pdf [file Table_1.pdf]

| Kinase                       | PoC at 1 $\mu$ M | Expressed in iPSC-derived microglia <sup>1</sup> (PubMed 33613545) | Implicated in neuroinflammation in glia cells | PubMed ID          |
|------------------------------|------------------|--------------------------------------------------------------------|-----------------------------------------------|--------------------|
| CSNK2A1                      | 0                | M                                                                  | Y                                             | 26732432           |
| DYRK1B                       | 0                | L                                                                  | Y                                             | 29751999           |
| HIPK2                        | 0                | M                                                                  | N                                             | N/A                |
| DYRK1A                       | 0.1              | M                                                                  | Y                                             | 29850989, 32896600 |
| HIPK1                        | 0.3              | M                                                                  | N                                             | N/A                |
| CSNK2A2                      | 0.5              | L                                                                  | Y                                             | 26732432           |
| ERK8                         | 0.9              | L                                                                  | N                                             | N/A                |
| HIPK3                        | 1                | M                                                                  | N                                             | N/A                |
| DRAK2                        | 1.1              | L                                                                  | N                                             | N/A                |
| JAK3(JH1domain-catalytic)    | 1.5              | L                                                                  | N                                             | N/A                |
| GRK7                         | 1.6              | L                                                                  | N                                             | N/A                |
| CLK1                         | 1.7              | M                                                                  | N                                             | N/A                |
| DAPK3                        | 1.8              | L                                                                  | N                                             | N/A                |
| ULK2                         | 2.2              | L                                                                  | N                                             | N/A                |
| DAPK2                        | 2.7              | L                                                                  | N                                             | N/A                |
| DAPK1                        | 2.8              | H                                                                  | Y                                             | 29967321           |
| CDK7                         | 2.9              | L                                                                  | N                                             | N/A                |
| CLK4                         | 2.9              | L                                                                  | N                                             | N/A                |
| GRK3                         | 3.9              | M                                                                  | N                                             | N/A                |
| NEK10                        | 3.9              | L                                                                  | N                                             | N/A                |
| DYRK2                        | 5.1              | M                                                                  | Y                                             | 29155197           |
| YSK4                         | 5.4              | L                                                                  | N                                             | N/A                |
| PIM1                         | 5.8              | M                                                                  | N                                             | N/A                |
| CLK2                         | 6.5              | M                                                                  | N                                             | N/A                |
| PIM3                         | 7.1              | M                                                                  | N                                             | N/A                |
| HIPK4                        | 7.8              | L                                                                  | N                                             | N/A                |
| TYK2(JH2domain-pseudokinase) | 9.4              | H                                                                  | N                                             | N/A                |
| RSK3(Kin.Dom.2-C-terminal)   | 9.8              | L                                                                  | N                                             | N/A                |
| DRAK1                        | 10               | L                                                                  | N                                             | N/A                |
| ICK                          | 10               | L                                                                  | N                                             | N/A                |
| IRAK1                        | 11               | H                                                                  | Y                                             | 31883536           |
| TAOK1                        | 11               | M                                                                  | N                                             | N/A                |
| GRK1                         | 14               | L                                                                  | N                                             | N/A                |
| PIKPYVE                      | 16               | M                                                                  | N                                             | N/A                |
| PFTK1                        | 17               | L                                                                  | N                                             | N/A                |
| CDK5                         | 18               | L                                                                  | Y                                             | 34238328           |
| GAK                          | 19               | M                                                                  | N                                             | N/A                |
| MEK5                         | 19               | L                                                                  | N                                             | N/A                |
| STK33                        | 21               | L                                                                  | N                                             | N/A                |
| RSK2(Kin.Dom.1-N-terminal)   | 23               | M                                                                  | N                                             | N/A                |
| RSK4(Kin.Dom.1-N-terminal)   | 23               | L                                                                  | N                                             | N/A                |
| CLK3                         | 25               | M                                                                  | N                                             | N/A                |
| GCN2(Kin.Dom.2,S808G)        | 26               | M                                                                  | N                                             | N/A                |
| TBK1                         | 26               | M                                                                  | Y                                             | 27211305, 30635357 |
| BMPR2                        | 27               | M                                                                  | N                                             | N/A                |
| PIP5K2C                      | 28               | M                                                                  | N                                             | N/A                |
| CDK5                         | 29               | M                                                                  | Y                                             | 22262900, 24495352 |
| LOK                          | 29               | H                                                                  | N                                             | N/A                |
| PAK2                         | 29               | H                                                                  | Y                                             | 29129728           |
| RSK1(Kin.Dom.1-N-terminal)   | 29               | H                                                                  | N                                             | N/A                |
| MELK                         | 30               | L                                                                  | N                                             | N/A                |
| PFTAIRE2                     | 30               | L                                                                  | N                                             | N/A                |
| SGK                          | 31               | H                                                                  | Y                                             | 33646633, 29755644 |
| PHKG2                        | 32               | M                                                                  | N                                             | N/A                |
| RSK1(Kin.Dom.2-C-terminal)   | 32               | H                                                                  | N                                             | N/A                |
| SLK                          | 32               | M                                                                  | N                                             | N/A                |
| DCAMKL3                      | 34               | L                                                                  | N                                             | N/A                |
| MERTK                        | 35               | H                                                                  | Y                                             | 28500071, 28925029 |
| PIK3CG                       | 35               | M                                                                  | Y                                             | 20025958           |
| TGFBR2                       | 35               | H                                                                  | Y                                             | 31727112           |

**Supplemental Table 1.** All kinases with PoC  $\leq$  35 inhibited by CX-4945, expression of inhibited kinases in microglia, and reported connections to neuroinflammation in glial cells.
